# Supplementary material
Source: Springer Nature journal article supplement (https://www.springermedizin.de/resource/supplementary/12936_2011_1764_MOESM4_ESM.pdf/9541698)
Supplement: MOESM4 [file 9541698]

\*---30---\*---40---\*---50---\*---60---\*---70---\*---80---\*---90---\*---100---\*---110---\*---120---\*---130---\*---140---\*---150---\*  
DiCo 1 QNYWEHPYQKSDVYHPINEHREHPKEYEYPLHQEHTYQQEDSGEDENTLQHAYPIDHEGAEPAPQEONLFSSEIIVERSNYMGNPWTEYMAKYDIEEVHGSGIRVDLGEDAEVAGTQYRLPSGKCPVFGKG  
DiCo 2 -----  
DiCo 3 -----  
FCR3 -----G-----  
HB3 -----N---R-----K-----  
NF54 -----N---R-----

---160---\*---170---\*---180---\*---190---\*---200---\*---210---\*---220---\*---230---\*---240---\*---250---\*---260---\*---270---\*---280---\*---  
DiCo 1 I I I E N S Q T T F L T P V A T E N Q D L K D G G F A F P P T K P L M S P M T L D Q M R H F Y K D N K Y V K N L D E L T L C S R H A G N M I P D N D K N S N Y K P A V Y D Y E D K K C H I L Y I A A Q E N N G P R Y C N K D E S K R N S M F C F R P A K D K S F Q N  
DiCo 2 -----K-----E--I-----N-G--D--N-E-----N---E-----N-----L-E-  
DiCo 3 -----K---G-----N-----D-DL---E-----N-----DK-----Q-----I---  
FCR3 -----N---K---G-----N--I---N-G--D--N-E-----N-----N-----Q-----L-E-  
HB3 -----K-----E--I-----L---E-----N-----N-----L-E-  
NF54 -----N-----G--Y-----E-----E-----DK-----I---

---290---\*---300---\*---310---\*---320---\*---330---\*---340---\*---350---\*---360---\*---370---\*---380---\*---390---\*---400---\*---410---\*---  
DiCo 1 Y V Y L S K N V V D N W E K V C P R K N L E N A K F G L W V D G N C E D I P H V N E F S A I D L F E C N K L V F E L S A S D Q P K Q Y E Q H L T D Y E K I K E G F K N K N A D M I R S A F L P T G A F K A D R Y K S H G K G Y N W G N Y N R K T Q K C E I F N V K P T  
DiCo 2 -----N-----  
DiCo 3 -----H---E-----Q-----N-----R-----T-E-  
FCR3 -T-----E-----N-----S-K-----E-  
HB3 -T-----E-----N-----S-K-----R-----T-E-  
NF54 -T-----Q-----P-----S-K-----T-E-

---420---\*---430---\*---440---\*---450---\*---460---\*---470---\*---480---\*---490---\*---500---\*---510---\*---520---\*---530---\*---540---\*---  
DiCo 1 C L I N D K S Y I A T T A L S H P I E V E H N F P C S L Y K D E I K K E I E R E S K R I K L N D N D D E G N K K I I A P R I F I S D D K D S L K C P C D P E I V S Q S T C N F F V C K C V E K R A E V T S N N E V V V K E E Y K D E Y A D I P E H K P T Y D K M  
DiCo 2 -----N--M-----  
DiCo 3 -----N--N-----I-----A--M-----R-----R-----N-  
FCR3 -----NS-----M--N--R-----R-----N-  
HB3 -----NS-----N--N-----N-----N-----N-  
NF54 -----NS-----N-----M-----M--N--R-----R-----
